# Supplementary material for: In Vitro Cytotoxicity and In Vivo Acute and Chronic Toxicity of Xanthii Fructus and Its Processed Product
Source: Biomed Res Int. 2013 Nov 26;2013:403491. doi: 10.1155/2013/403491 (PMC3858965; doi:10.1155/2013/403491)
Supplement: Supplementary file 1 — Supplement Tables 1-4 provided the data of BUN and Scr values in female and male rats in chronic toxicity assays, respectively. [file 403491.f1.doc]

**Supplement**

**Supplement Table 1. BUN value of female rats in chronic toxicity assays（X±SD，n≥2）（mmol/L）**

| Weeks | Ⅰ | Ⅱ | Ⅲ | Ⅳ | Ⅴ | Ⅵ | Ⅶ |
| --- | --- | --- | --- | --- | --- | --- | --- |
| 3 | 8.53±1.16 | 9.78±0.616 | 9.74±1.04 | 9.37±0.674 | 8.21±1.08 | 10.8±2.60 | 9.55±2.09 |
| 4 | 8.76±1.00 | 8.78±0.613 | 8.77±0.0808 | 9.49±0.951 | 7.82±1.31 | 8.14±1.26 | 7.27±0.672 |
| 5 | 10.6±1.11 | 9.40±1.25 | 8.04±1.72 | 9.58±0.913 | 8.78±0.358 | 9.81±1.15 | 7.61±1.15 |
| 6 | 9.16±1.52 | 8.09±1.12 | 7.41±0.555 | 9.48±1.88 | 8.89±1.21 | 8.62±0.530# | 8.62±0.877 |
| 7 | 8.15±1.73 | 8.07±0.579 | 7.31±0.313 | 7.86±0.586 | 6.77±1.11 | 7.19±0.810 | 7.84±0.240 |
| 8 | 7.46±1.41 | 6.19±0.0922 | 5.93±1.23 | 7.00±0.323 | 6.68±1.46 | 7.19±1.65 | 9.03±1.75 |
| 9 | 8.08±2.07 | 9.33±3.49 | 8.28±0.509 | 7.87±1.89 | 7.19±0.750 | 8.33±2.61 | 8.51±4.13 |
| 10 | 8.92±1.35 | 9.48±1.22 | 9.23±1.55 | 11.60±1.29 | 9.79±2.21 | 11.5±3.12 | 12. 6±0.976* |
| 11 | 7.06±0.615 | 8.23±3.19 | 6.57±0.707 | 14.25±1.25** | 5.63±3.62 | 5.34±1.12 | 11.6±2.04* |
| 12 | 11.9±0.820 | 12.2±1.27 | 11.29±0.651 | 14.01±2.65 | 9.54±1.53 | 8.51±1.18 | 15.1±1.61* |

The * indicates a significant difference compared with control group, * *P* < 0.05, ** *P* < 0.01, *** *P* < 0.001.

The # indicates a significant difference compared with XF groups in the same dosage, # *P* < 0.05, ## *P* < 0.01, ### *P* < 0.001.

**Supplement Table 2. BUN value of male rats in chronic toxicity assays（X±SD，n≥2）（mmol/L）**

| Weeks | Ⅰ | Ⅱ | Ⅲ | Ⅳ | Ⅴ | Ⅵ | Ⅶ |
| --- | --- | --- | --- | --- | --- | --- | --- |
| 3 | 7.75±1.26 | 8.56±0.375 | 8.21±0.711 | 9.42±1.22 | 9.62±0.361 | 8.38±0.654 | 7.97±0.540 |
| 4 | 7.71±1.08 | 8.60±0.555 | 8.07±0.423 | 8.88±1.18 | 7.69±0.695 | 7.04±0.305# | 8.06±0.419 |
| 5 | 7.86±0.714 | 7.80±0.838 | 8.03±1.28 | 7.86±1.39 | 7.47±0.779 | 7.09±0.433 | 7.87±0.494 |
| 6 | 8.23±0.624 | 8.28±0.368 | 8.05±0.467 | 7.94±0.467 | 8.25±1.03 | 8.23±0.210 | 8.33±0.690 |
| 7 | 7.41±0.789 | 7.41±0.668 | 7.01±0.499 | 7.04±0.234 | 5.89±0.116 | 7.68±0.822 | 7.80±0.525 |
| 8 | 5.68±1.67 | 4.60±0.839 | 4.03±0.887 | 5.54±0.378 | 5.28±2.59 | 4.84±1.87 | 4.86±1.03 |
| 9 | 10.6±1.25 | 10.2±2.09 | 7.42±2.64 | 9.59±3.19# | 10.2±2.29 | 8.13±2.40 | 5.99±1.46# |
| 10 | 13.1±2.07 | 12.2±2.06 | 13.2±2.94 | 15. 9±0.899# | None | 11.0±3.62 | 9.63±1.84# |
| 11 | 8.27±2.23 | 10.1±3.52 | 11.5 | 9.92±4.38 | None | 11.5±2.61 | 10.3±3.90 |
| 12 | 9.39±1.24 | 10.3±1.31 | 9.30 | 11.9±2.82# | None | 8.50±2.92 | 7.35±1.03# |

The * indicates a significant difference compared with control group, * *P* < 0.05, ** *P* < 0.01, *** *P* < 0.001.

The # indicates a significant difference compared with XF groups in the same dosage, # *P* < 0.05, ## *P* < 0.01, ### *P* < 0.001.

None results were obtained in Group V male rats due to all rats were dead at the end of the 10th week.

Only one rat in Group III were survived in the 11th and 12th, therefore, no SD could be calculated in this group.

**Supplement Table 3. Scr value of female rats in chronic toxicity assays（X±SD，n≥2）（μmol/L）**

| Weeks | Ⅰ | Ⅱ | Ⅲ | Ⅳ | Ⅴ | Ⅵ | Ⅶ |
| --- | --- | --- | --- | --- | --- | --- | --- |
| 3 | 68.7±0.833 | 68.1±3.97 | 68.2±2.67 | 68.1±5.39 | 64.2±1.46 | 68.8±2.82 | 66.1±4.82 |
| 4 | 69.9±8.03 | 71.0±4.70 | 67.2±0.595 | 70.3±6.05 | 63.9±4.92 | 67.2±4.97 | 63.8±1.29 |
| 5 | 74.7±8.06 | 75.0±1.65 | 69.8±6.51 | 79.9±3.06 | 75.3±7.95 | 75.1±3.08 | 71.9±2.42 |
| 6 | 62.2±2.58 | 63.3±5.35 | 53.8±14.3 | 62.7±4.57 | 61.3±3.19 | 60.0±2.25 | 66.2±0.269 |
| 7 | 72.2±5.05 | 73.8±4.87 | 75.6±2.06 | 78.6±3.67 | 71.1±3.75 | 69.5±6.43 | 73.3±18.7 |
| 8 | 63.5±6.04 | 68.9±4.26 | 65.6±5.13 | 72.4±2.19 | 66.5±4.53 | 74.8±1.45*# | 77.4±0.163 |
| 9 | 69.6±18.6 | 67.1±16.7 | 52.3±5.44 | 74.3±17.7 | 65.6±7.12 | 71.3±26.7 | 67.3±1.36 |
| 10 | 79.8±13.2 | 76.0±11.6 | 87.8±10.7 | 83.8±14.0 | 76.5±2.88 | 68.8±5.54 | 75.5±0.127 |
| 11 | 57.3±8.07 | 79.0±9.43* | 71.0±6.31 | 79.2±22.1 | 65.8±27.9 | 50.8±4.25# | 83.1±0.523** |
| 12 | 52.4±15.5 | 56.8±6.24 | 60. 7±6.82 | 60.4±17.7 | 65.2±12.2 | 71. 7±14.7 | 75.0±5.78 |

The * indicates a significant difference compared with control group, * *P* < 0.05, ** *P* < 0.01, *** *P* < 0.001.

The # indicates a significant difference compared with XF groups in the same dosage, # *P* < 0.05, ## *P* < 0.01, ### *P* < 0.001.

**Supplement Table 4. Scr value of male rats in chronic toxicity assays（X±SD，n≥2）（μmol/L）**

| Weeks | Ⅰ | Ⅱ | Ⅲ | Ⅳ | Ⅴ | Ⅵ | Ⅶ |
| --- | --- | --- | --- | --- | --- | --- | --- |
| 3 | 56.0±2.25 | 55.5±3.55 | 62.9±5.40 | 61.2±2.19 | 61.8±5.08 | 63.6±4.37* | 63.1±5.58 |
| 4 | 62.5±2.96 | 58.8±7.80 | 58.2±5.96 | 64.9±3.93 | 64.2±1.12 | 65.8±4.36 | 59.6±9.08 |
| 5 | 67.2±2.97 | 67.7±5.82 | 65.6±0.613 | 69.1±7.78 | 63.8±4.37 | 68.5±5.91 | 66.5±7.89 |
| 6 | 61.4±5.63 | 62.0±10.5 | 61.0±4.70 | 72.4±5.39 | 70.9±5.46 | 68.5±2.52 | 70.2±4.98 |
| 7 | 67.4±6.48 | 62.1±7.58 | 59.2±3.21 | 70.4±5.13 | 73.5±3.55 | 71. 9±3.25## | 55.8±8.52 |
| 8 | 62.1±3.19 | 69.3±7.58 | 76.5±7.68* | 57.0±25.5 | 63.7±4.55 | 74.1±3.65** | 73.5±2.16 |
| 9 | 64.0±24.5 | 61.9±15.7 | 52.6±9.61 | 63.3±19.3 | 65.2±21.5 | 50.0±9.18 | 59.9±8.46 |
| 10 | 82.5±10.8 | 60.7±9.32 | 66.1±15.6 | 71.1±8.72 | None | 66.2±15.2 | 68.3±4.72 |
| 11 | 70.4±14.5 | 69.9±16.9 | 73.5 | 75.3±16.9 | None | 63.18±14.4 | 65.9±6.44 |
| 12 | 68.9±15.6 | 65.2±25.4 | 78.1 | 61.4±18.1 | None | 65.7±2.86 | 57.1±6.89 |

The * indicates a significant difference compared with control group, * *P* < 0.05, ** *P* < 0.01, *** *P* < 0.001.

The # indicates a significant difference compared with XF groups in the same dosage, # *P* < 0.05, ## *P* < 0.01, ### *P* < 0.001.

None results were obtained in Group V male rats due to all rats were dead at the end of the 10th week.

Only one rat in Group III were survived in the 11th and 12th, therefore, no SD could be calculated in this group
